# Supplementary material for: A unique enhancer boundary complex on the mouse ribosomal RNA genes persists after loss of Rrn3 or UBF and the inactivation of RNA polymerase I transcription
Source: PubMed Central journal article supplement (PMC5536353; doi:10.1371/journal.pgen.1006899), 2017-07-17
Supplement: pgen.1006899.s002.pdf [file pgen.1006899.s002.pdf]

A)

| Age (dpc)   | Number | <i>Rrn3(Tif1a)<sup>+/+</sup></i> | <i>Rrn3(Tif1a)<sup>+/-</sup></i> | <i>Rrn3(Tif1a)<sup>-/-</sup></i> |
|-------------|--------|----------------------------------|----------------------------------|----------------------------------|
| 3.5         | 25     | 6 (24.0%)                        | 14 (56.0%)                       | 5 (20.0%)                        |
| 3.5 (BL/6)  | 10     | 3 (30.0%)                        | 4 (40.0%)                        | 3 (30.0%)                        |
| 6.5         | 17     | 9 (53.0%)                        | 8 (47.0%)                        | 0 (0.0%)                         |
| 8.5         | 14     | 3 (21.4%)                        | 11 (78.6%)                       | 0 (0.0%)                         |
| 8.5 (BL/6)  | 9      | 3 (33.3%)                        | 6 (66.7%)                        | 0 (0.0%)                         |
| 9.5         | 36     | 10 (27.8%)                       | 26 (72.2%)                       | 0 (0.0%)                         |
| 9.5 (BL/6)  | 29     | 6 (20.7%)                        | 23 (79.3%)                       | 0 (0.0%)                         |
| 10.5        | 8      | 3 (37.5%)                        | 5 (62.5%)                        | 0 (0.0%)                         |
| Pups        | 70     | 22 (31.4%)                       | 48 (68.6%)                       | 0 (0.0%)                         |
| Pups (BL/6) | 21     | 5 (23.8%)                        | 16 (76.2%)                       | 0 (0.0%)                         |

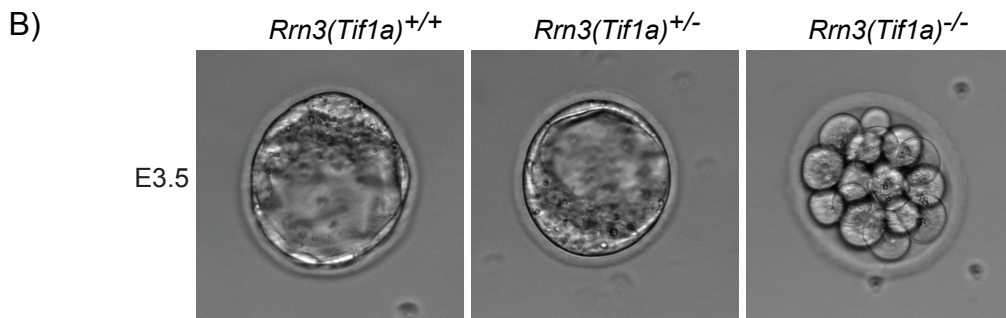

C)

| Pups      | <i>Ubf<sup>+/-</sup>Rrn3<sup>+/-</sup></i> |           |         |            |            |         |         |         |         |
|-----------|--------------------------------------------|-----------|---------|------------|------------|---------|---------|---------|---------|
|           | Genotype                                   |           |         |            |            |         |         |         |         |
|           | +/+ +/+                                    | +/+ +/-   | +/+ -/- | +/- +/+    | +/- +/-    | +/- -/- | -/- +/+ | -/- +/- | -/- -/- |
| Number:   | 1 (3.6%)                                   | 8 (28.6%) | 9 (0%)  | 10 (21.4%) | 13 (46.4%) | 0 (0%)  | 0 (0%)  | 0 (0%)  | 0 (0%)  |
| Expected: | 6.25%                                      | 12.50%    | 6.25%   | 12.50%     | 25.00%     | 12.50%  | 6.25%   | 12.50%  | 6.25%   |
