# Supplementary material for: A unique enhancer boundary complex on the mouse ribosomal RNA genes persists after loss of Rrn3 or UBF and the inactivation of RNA polymerase I transcription
Source: PubMed Central journal article supplement (PMC5536353; doi:10.1371/journal.pgen.1006899), 2017-07-17

Genotype:-

IP:-

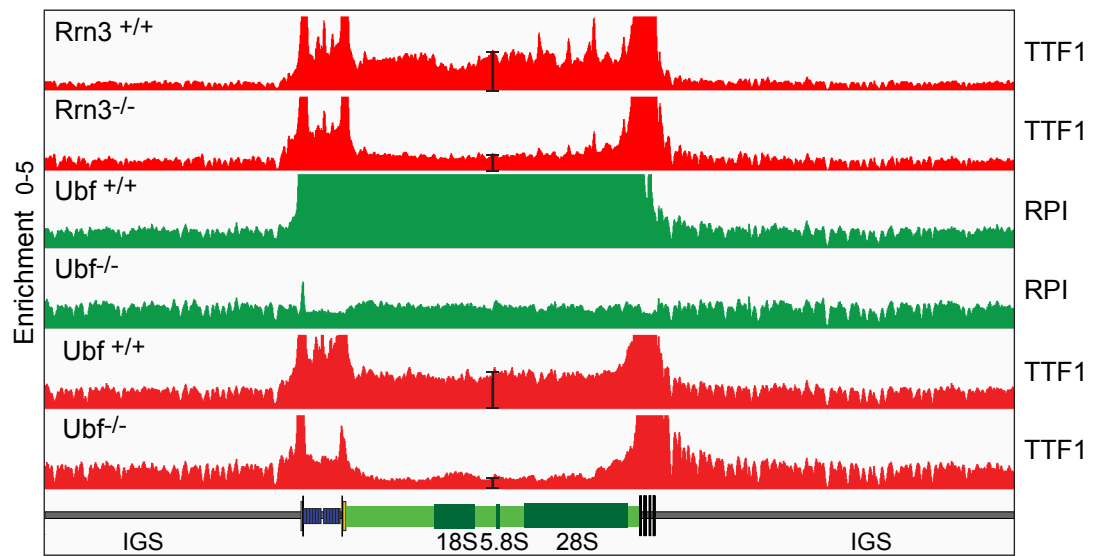

Supplement: pgen.1006899.s004.pdf [file pgen.1006899.s004.pdf]
